# Supplementary material for: Therapeutic inhibition of FcγRIIb signaling targets leukemic stem cells in chronic myeloid leukemia
Source: PubMed Central journal article supplement (PMC7515845; doi:10.1038/s41375-020-0977-8), 2020-07-20
Supplement: 41375_2020_977_MOESM2_ESM.pdf [file 41375_2020_977_MOESM2_ESM.pdf]

## Supplementary Information

### **Therapeutic inhibition of FcγRIIb signaling targets leukemic stem cells in chronic myeloid leukemia**

Oliver Parting<sup>1</sup>, Samantha Langer<sup>2</sup>, Maja Kim Kuepper<sup>1</sup>, Caroline Wessling<sup>3</sup>, Shaoguang Li<sup>4</sup>, Till Braunschweig<sup>5</sup>, Nicolas Chatain<sup>1</sup>, Michael Huber<sup>6</sup>, Tim H Brümmendorf<sup>1</sup>, Steffen Koschmieder<sup>1</sup>, and Mirle Schemionek<sup>1</sup>

<sup>1</sup>Department of Hematology, Oncology, Hemostaseology, and Stem Cell Transplantation, Faculty of Medicine, University Hospital RWTH Aachen, Aachen, Germany; <sup>2</sup>Department of Transfusion Medicine, University Hospital Essen, Essen, Germany; <sup>3</sup>Department of Neurosurgery, Clemens Hospital, Muenster, Germany; <sup>4</sup>Department of Medicine, University of Massachusetts Medical School, Worcester, Massachusetts, USA; <sup>5</sup>Department of Pathology, University Hospital RWTH Aachen, Aachen, Germany; <sup>6</sup>Institute of Biochemistry and Molecular Immunology, RWTH Aachen University, Aachen, Germany

**Supplementary Table S1: sequences of primer and probes applied in this study**

| <b>Oligonucleotide</b> | <b>Sequence 5'-3'</b>                  |
|------------------------|----------------------------------------|
| Bcr-Abl forward        | CGTCAACTCAGCCACTGG                     |
| Bcr-Abl reverse        | GGCTTCACTCAGACCCTGA                    |
| Bcr-Abl probe          | FAM-AGCGGCCAGTATCATCTGACTTTGAGC-TAMRA  |
| GAPDH forward          | TTGTGCAGTGCCAGCCTC                     |
| GAPDH reverse          | CCAATACGGCCAATCCG                      |
| GAPDH probe            | FAM-TCCCGTAGACAAAATGGTGAAGGTCGGT-TAMRA |
| p16 forward            | TCATCATCACCTGAATCGGGG                  |
| p16 reverse            | AAAGCGAACTCGAGGAGAGC                   |
| p19 forward            | GCCGCACCGGAATCCT                       |
| p19 reverse            | TTGAGCAGAAGAGCTGCTACGT                 |
| p21 forward            | GTGGGTCTGACTCCAGCCC                    |
| p21 reverse            | CCTTCTCGTGAGACGCTTAC                   |
| p27 forward            | TCGCAAAACAAAAGGGCCAA                   |
| p27 reverse            | CTTAATTCGGAGCTGTTTACGTC                |

**Supplementary Table S2: shRNAs sequences**

| <b>shRNA</b>            | <b>Sequence 5'-3'</b>                                                                                            |
|-------------------------|------------------------------------------------------------------------------------------------------------------|
| #1_shRNA_<br>FcyRIIb_F  | TCGAGTGCTGTTGACAGTGAGCGCCGGTGACACTGAC<br>ATGCGAAGTAGTGAAGCCACAGATGTACTTCGCATGT<br>CAGTGTACCGTTGCCTACTGCCTCGGAG   |
| #1_shRNA_<br>FcyRIIb_R  | AATTCTCCGAGGCAGTAGGCAACGGTGACACTGACAT<br>GCGAAGTACATCTGTGGCTTCACTACTTCGCATGTCA<br>GTGTACCGGCGCTCACTGTCAACAGCAC   |
| #2_shRNA_<br>FcyRIIb_F  | TCGAGTGCTGTTGACAGTGAGCGCGGGATGCTGTAGA<br>TATTAAGTAGTGAAGCCACAGATGTACTTTAATATCTA<br>CAGCATCCCTGCCTACTGCCTCGGAG    |
| #2_shRNA_<br>FcyRIIb_R  | AATTCTCCGAGGCAGTAGGCAAGGGATGCTGTAGATA<br>TTAAAGTACATCTGTGGCTTCACTACTTTAATATCTACA<br>GCATCCCGCGCTCACTGTCAACAGCAC  |
| #3_shRNA_<br>FcyRIIb_F  | TCGAGTGCTGTTGACAGTGAGCGGAGGATGCTGTAGAT<br>ATTAAAGATAGTGAAGCCACAGATGTATCTTTAATATCT<br>ACAGCATCCCTGCCTACTGCCTCGGAG |
| #3_shRNA_<br>FcyRIIb_R  | AATTCTCCGAGGCAGTAGGCAAGGGATGCTGTAGATAT<br>TAAAGATACATCTGTGGCTTCACTATCTTTAATATCTAC<br>AGCATCCTCGCTCACTGTCAACAGCAC |
| Scrambled_<br>FcyRIIb_F | TCGAGTGCTGTTGACAGTGAGCGCGGTAAATTATTGT<br>GATTTAGTTAGTGAAGCCACAGATGTAACATAATCACA<br>ATAATTTACCTTGCCTACTGCCTCGGAG  |
| Scrambled_<br>FcyRIIb_R | AATTCTCCGAGGCAGTAGGCAAGGTAATTATTGTGAT<br>TTAGTTACATCTGTGGCTTCACTAACTAAATCACAATAA<br>TTTACCGCGCTCACTGTCAACAGCAC   |

**Supplementary Table S3: Antibodies for immunophenotyping applied in this study**

| <b>Antibody</b>         | <b>Supplier</b>   | <b>Cell clone</b> |
|-------------------------|-------------------|-------------------|
| CD3-PE Cy5              | Biolegend         | 17A2              |
| Gr-1-PE Cy5             | Biolegend         | RB6-8C5           |
| Gr-1-Tri Color          | Life technologies | RM3006            |
| CD4-Tri Color           | Life technologies | MCD0406           |
| CD4-PE Cy5              | Biolegend         | RM4-5             |
| CD8 $\alpha$ -Tri Color | Life technologies | MCD0806           |
| CD8a-PECy5              | Biolegend         | 53-6.7            |
| CD11b-PE Cy5            | Biolegend         | M1/70             |
| CD117(cKit) -APC Cy7    | Biolegend         | 2B8               |
| Sca-1-Biotin            | Biolegend         | E12-161.7         |
| Streptavidin-PE Cy7     | BD Bioscience     |                   |
| CD45.1-APC              | Biolegende        | A20               |
| CD45.2-Pacific Blue     | Biolegende        | 104               |
| CD32b-PE                | eBioscience       | AT130-2           |
| CD32b-APC               | eBioscience       | AT130-2           |
| Rat IgG2a kappa-PE      | eBioscience       | eBR2a             |
| Rat IgG2a kappa-APC     | eBioscience       | eBR2a             |
