# Supplementary material for: Therapeutic inhibition of FcγRIIb signaling targets leukemic stem cells in chronic myeloid leukemia
Source: Leukemia. 2020 Jul 20;34(10):2635–47. doi: 10.1038/s41375-020-0977-8 (PMC7515845; doi:10.1038/s41375-020-0977-8)
Supplement: Supplementary file 1 — Supplementary Figures [file 41375_2020_977_MOESM1_ESM.pdf]

## Supplementary Information

# Therapeutic inhibition of FcγRIIb signaling targets leukemic stem cells in chronic myeloid leukemia

Oliver Parting<sup>1</sup>, Samantha Langer<sup>2</sup>, Maja Kim Kuepper<sup>1</sup>, Caroline Wessling<sup>3</sup>, Shaoguang Li<sup>4</sup>, Till Braunschweig<sup>5</sup>, Nicolas Chatain<sup>1</sup>, Tiago Maié<sup>6</sup>, Ivan G. Costa<sup>6</sup>, Martina Crysandt<sup>1</sup>, Michael Huber<sup>7</sup>, Tim H Brümmendorf<sup>1</sup>, Steffen Koschmieder<sup>1</sup>, and Mirle Schemioneck<sup>1</sup>

<sup>1</sup>Department of Hematology, Oncology, Hemostaseology, and Stem Cell Transplantation, Faculty of Medicine, University Hospital RWTH Aachen, Aachen, Germany; <sup>2</sup>Department of Transfusion Medicine, University Hospital Essen, Essen, Germany; <sup>3</sup>Department of Neurosurgery, Clemens Hospital, Muenster, Germany; <sup>4</sup>Department of Medicine, University of Massachusetts Medical School, Worcester, Massachusetts, USA; <sup>5</sup>Department of Pathology, University Hospital RWTH Aachen, Aachen, Germany; <sup>6</sup>Institute for Computational Genomics, Joint Research Center for Computational Biomedicine, RWTH Aachen University, Aachen, Germany, <sup>7</sup>Institute of Biochemistry and Molecular Immunology, RWTH Aachen University, Aachen, Germany

Supplementary Figure S1

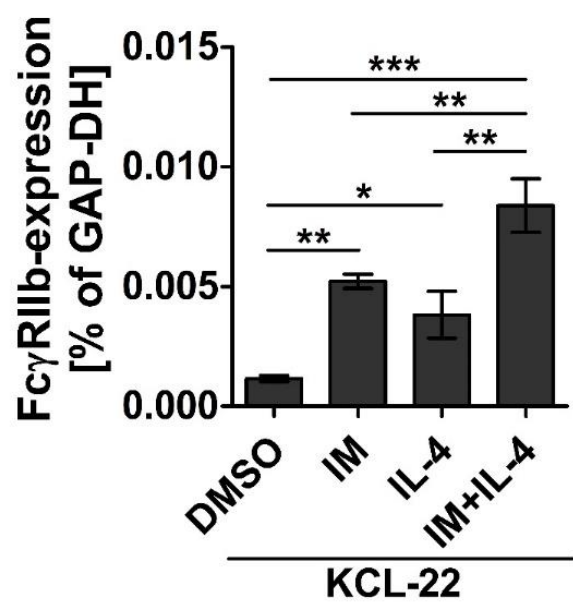

**IL-4 contributes to malignant FcγRIIb upregulation in Bcr-Abl<sup>+</sup> cells.** CML KCL-22 cells were treated with 2μM Imatinib, 100ng/ml IL-4 or the combination. mRNA expression of FcγRIIb was evaluated by qRT-PCR. Data are shown as mean ± SD. \*p<0.05, \*\*p<0.001, \*\*\*p<0.0001

Supplementary Figure S2

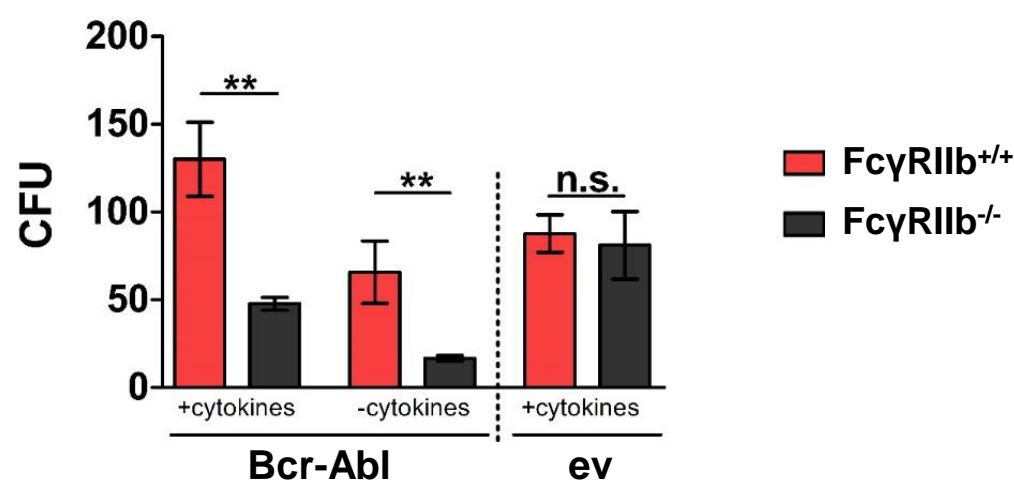

**Clonogenic potential of malignant but not normal Hoxb8-immortalized FcγRIIb<sup>-/-</sup> cells is impaired.** 2000 HoxB8-immortalized FcγRIIb<sup>+/+</sup>:ev, FcγRIIb<sup>-/-</sup>:ev, FcγRIIb<sup>+/+</sup>:Bcr-Abl and FcγRIIb<sup>-/-</sup>:Bcr-Abl BM cells were seeded in methylcellulose with and without cytokines and analyzed for colony formation after 7 days.

Supplementary Figure S3

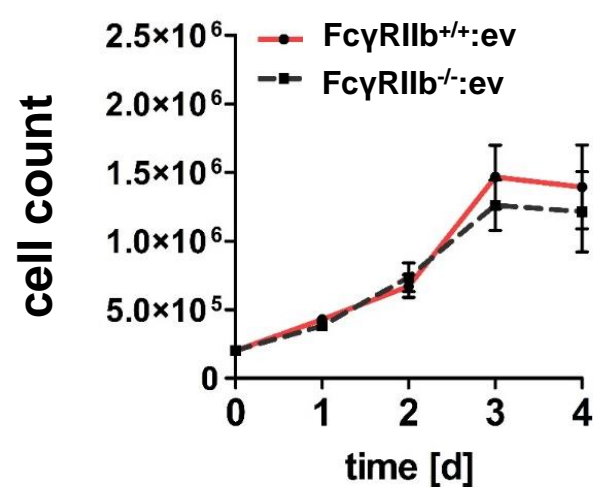

**BM cell proliferation is not affected by FcγRIIb depletion.** Proliferation of FcγRIIb<sup>+/+</sup>:ev (empty vector) and FcγRIIb<sup>-/-</sup>:ev transduced cells was analyzed using trypan-blue exclusion method.

Supplementary Figure S4

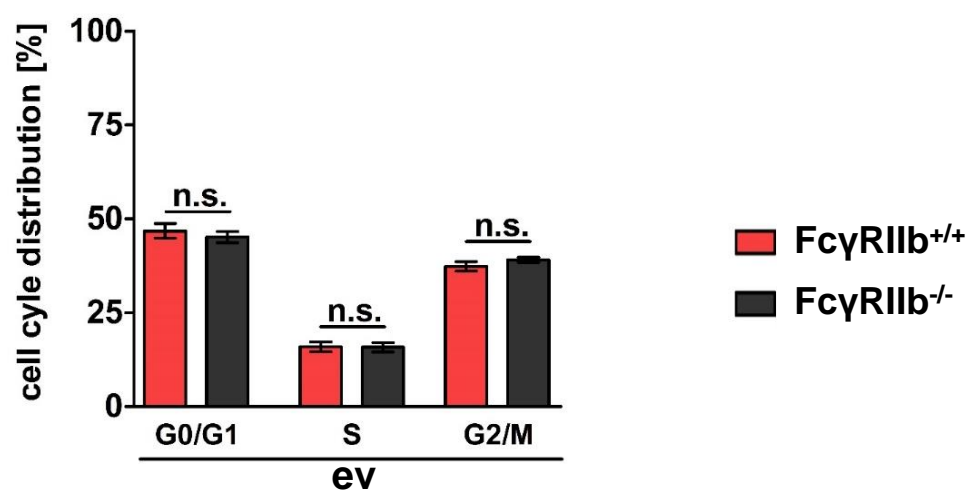

**Cell cycle phase is not affected by FcγRIIb depletion.** Cell cycle analysis of FcγRIIb<sup>+/+</sup>:ev and FcγRIIb<sup>-/-</sup>:ev BM cells was performed by propidium iodide method using FACS analysis. Data are shown as mean ± SD; ns= not statistically significant

Supplementary Figure S5

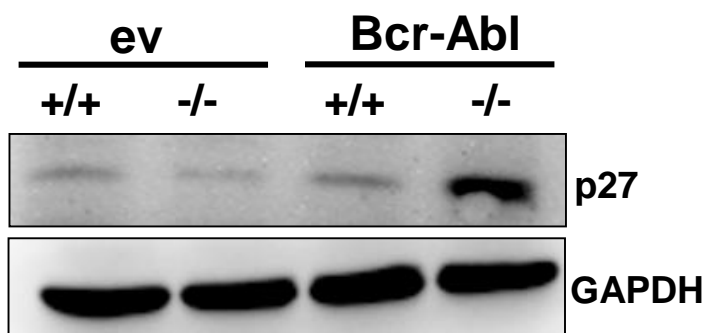

**Increased expression of negative cell cycle regulator p27 in Bcr-Abl<sup>+</sup> cells upon FcγRIIb depletion.** p27<sup>Cip1</sup> protein expression was analyzed by western blot in FcγRIIb<sup>+/+</sup> and FcγRIIb<sup>-/-</sup> Bcr-Abl<sup>+</sup> and empty vector (ev) cells.

Supplementary Figure S6

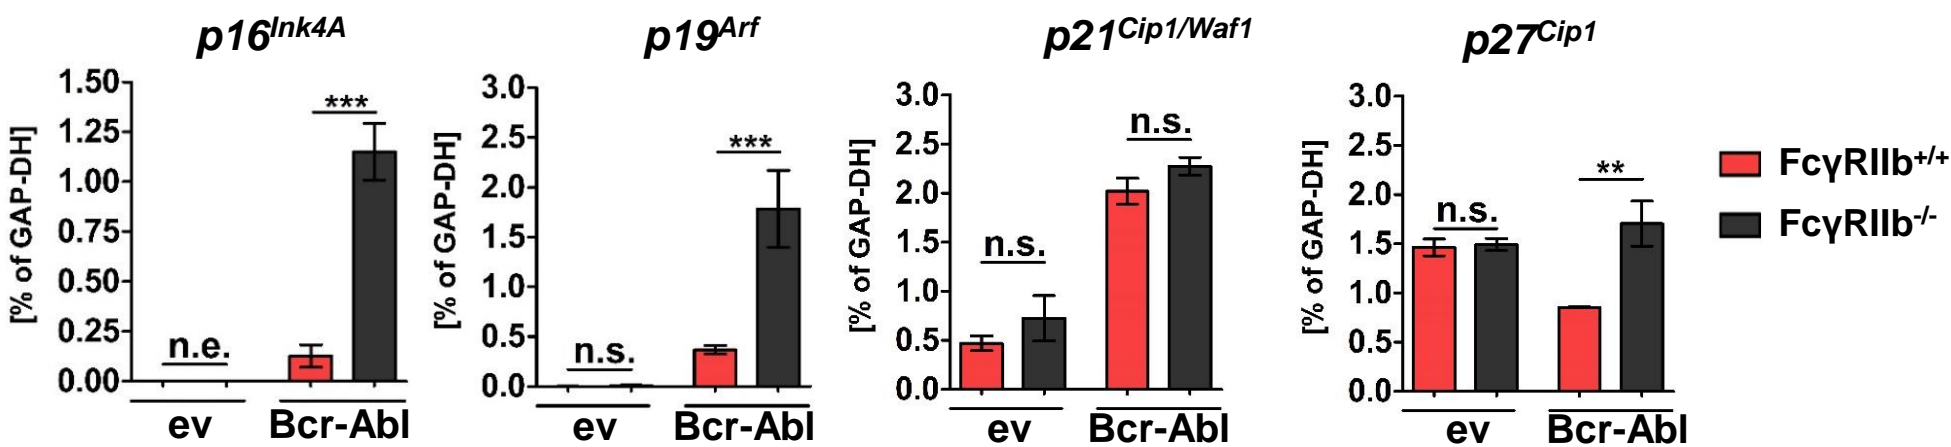

**Elevated mRNA levels of negative cell cycle regulators in Bcr-Abl<sup>+</sup> cells upon FcγRIIb depletion.** mRNA expression analyses of p16<sup>Ink4A</sup>, p19<sup>Arf</sup>, p21<sup>Cip1/Waf1</sup> and p27<sup>Cip1</sup> using qRT-PCR. Data are shown as mean ± SD. n=3 each; \*\*p<0.001, \*\*\*p<0.0001; ns= not statistically significant, ne= not expressed.

Supplementary Figure S7

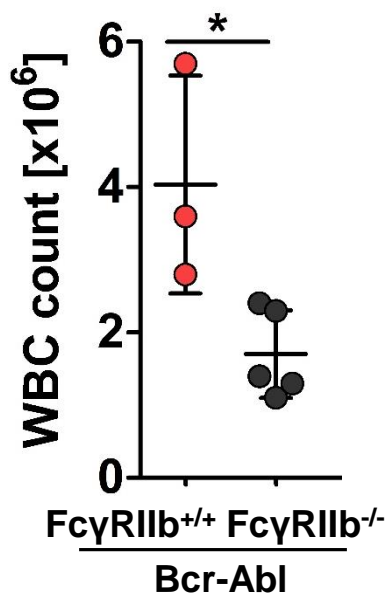

**Decreased WBC in Bcr-Abl<sup>+</sup> mice upon FcγRIIb depletion.** Peripheral blood (PB) was analyzed for white blood cell count (WBC) in transplanted recipients receiving FcγRIIb<sup>+/+</sup>:Bcr-Abl (n=3) or FcγRIIb<sup>-/-</sup>:Bcr-Abl (n=5) BM cells. Data are shown as mean ± SD; \*p<0.05

Supplementary Figure S8

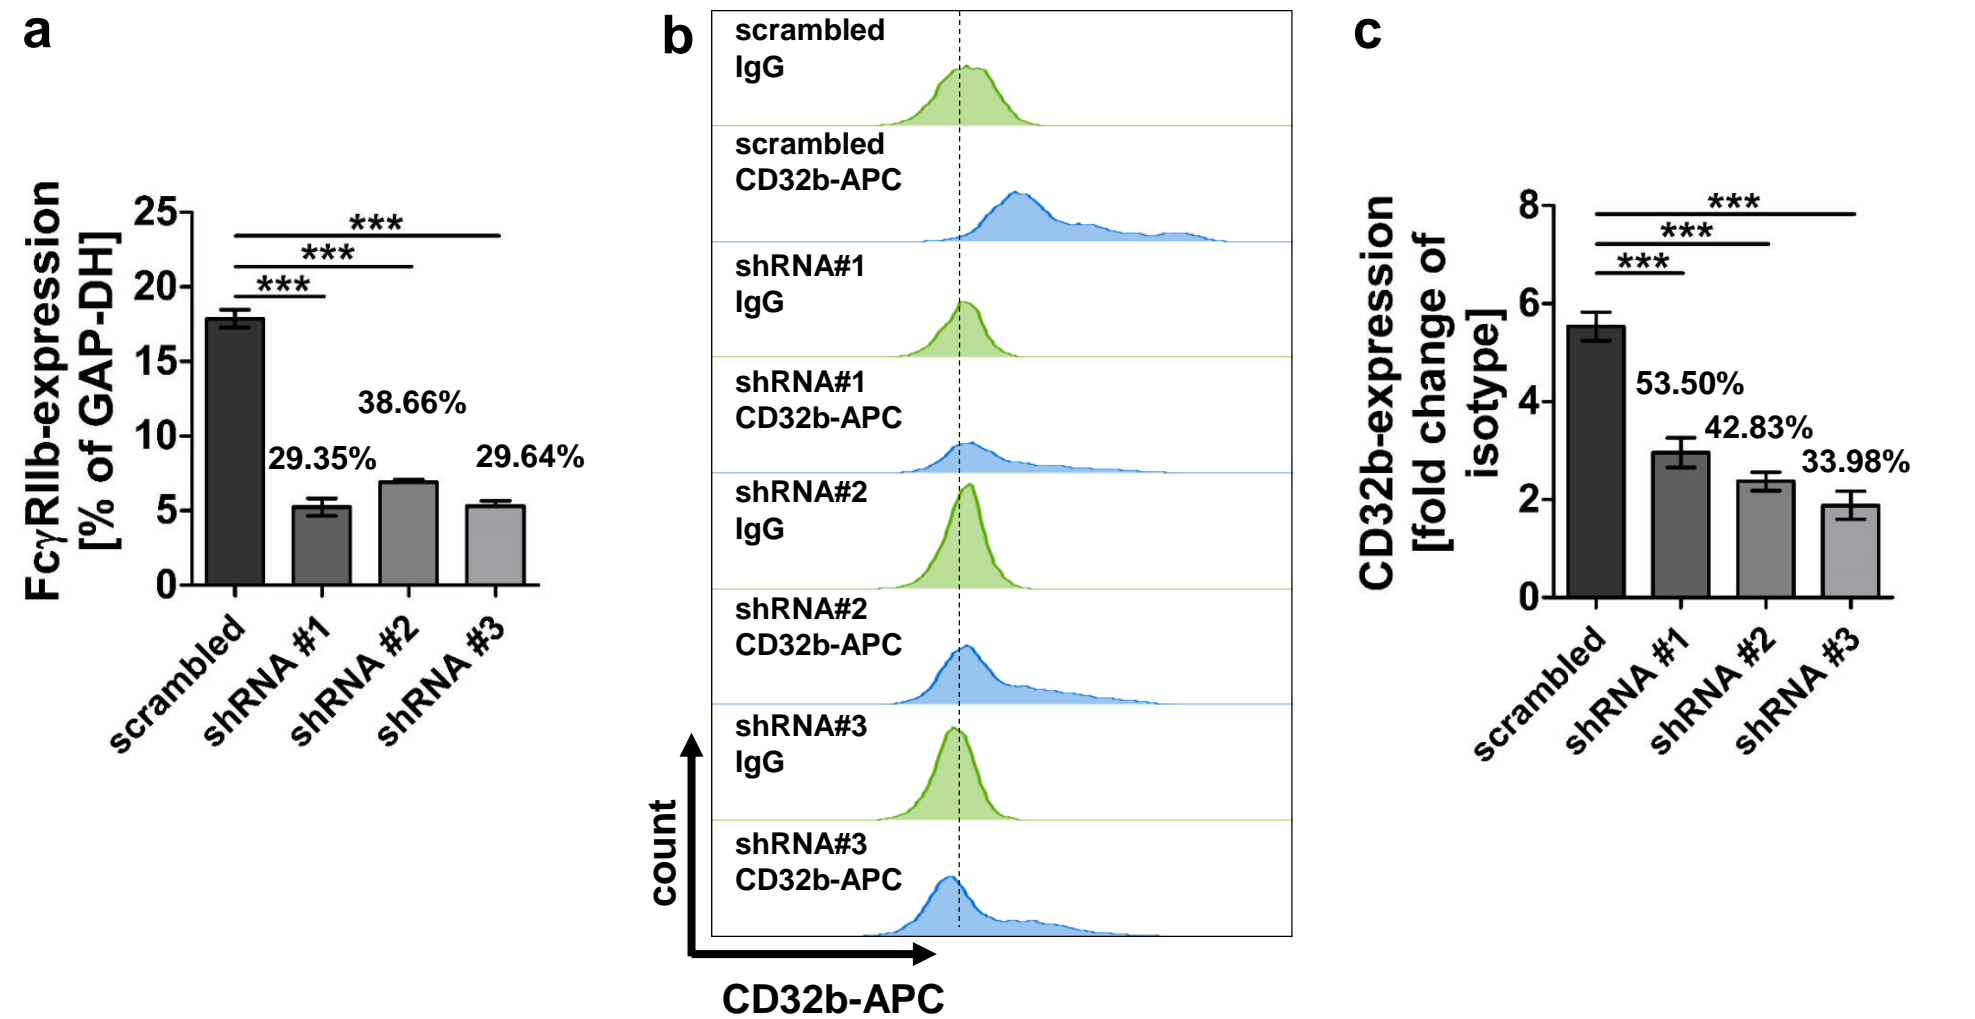

**FcγRIIb mRNA and protein expression are significantly reduced by shRNA targeting.** Three different shRNAs targeting FcγRIIb were retrovirally introduced into C567B/L6 lin<sup>-</sup> BM cells. **(a)** FcγRIIb-expression was analyzed using qRT-PCR in FACS sorted infected C567B/L6 lin<sup>-</sup> BM cells. **(b)** FcγRIIb cell surface expression was analyzed by FACS using CD32b-APC antibody or IgG control. **(c)** Quantification of FcγRIIb surface expression. Data are shown as mean ± SD; \*\*\*p<0.0001

Supplementary Figure S9

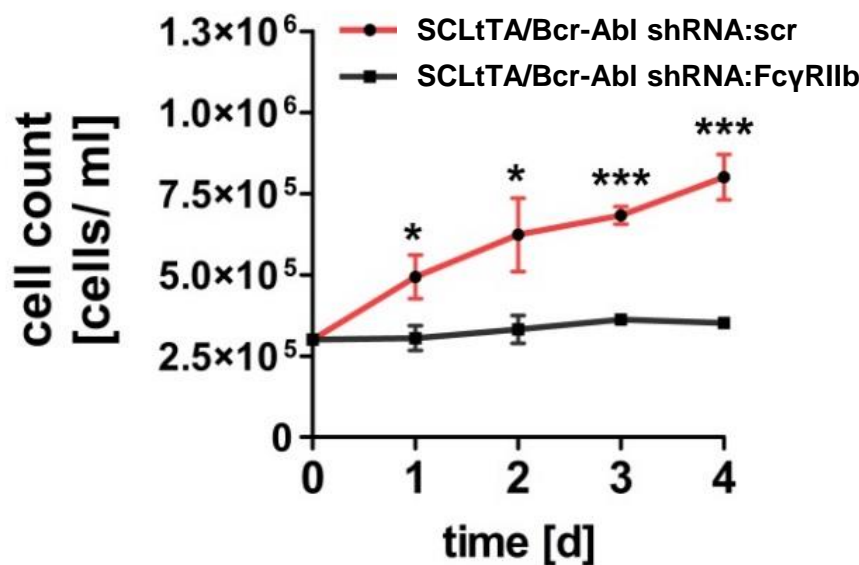

**Cell proliferation is decreased in malignant cells upon FcyRIIb targeting.** 3x10<sup>5</sup> cells/ml were used to assess proliferation of immortalized transgenic Bcr-Abl BM cells transduced with shRNA targeting FcyRIIb or scr control (n=3, each).

Supplementary Figure S10

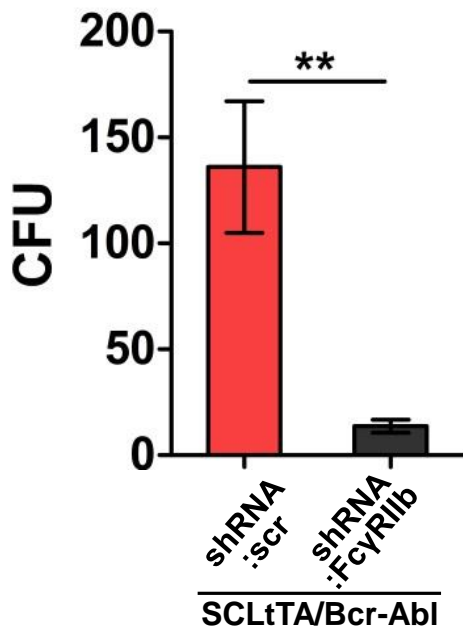

**Impaired clonogenic potential in malignant cells upon FcyRIIb targeting.** 2000 cells/ml of immortalized SCLtTA/Bcr-Abl cells transduced with shRNA targeting FcyRIIb or shRNA:scr control were seeded in methylcellulose containing cytokines. Colony formation was analyzed after 7 days of culture (n=3, each).

Supplementary Figure S11

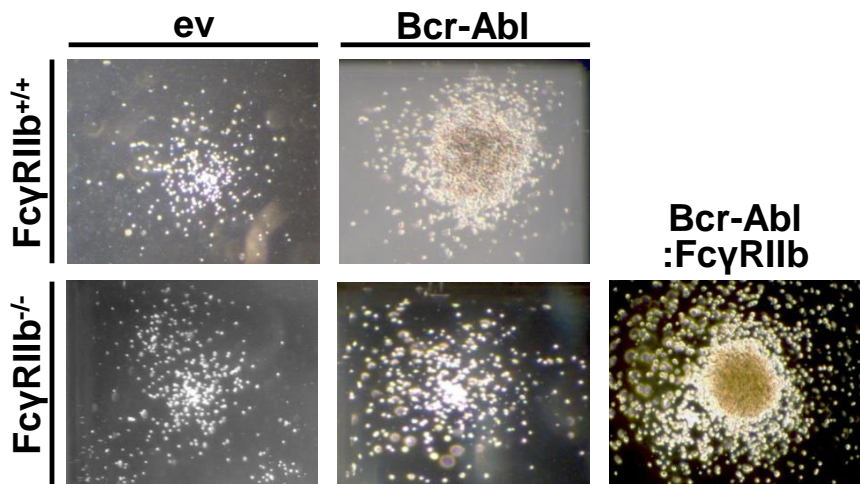

**Malignant colony morphology is restored upon FcyRIIb re-expression in malignant cells.** CFU morphology of FcyRIIb<sup>+/+</sup>:ev, FcyRIIb<sup>-/-</sup>:ev, FcyRIIb<sup>+/+</sup>:Bcr-Abl, FcyRIIb<sup>-/-</sup>:Bcr-Abl, or FcyRIIb<sup>-/-</sup>:Bcr-Abl:FcyRIIb colonies.

## Supplementary Figure S12

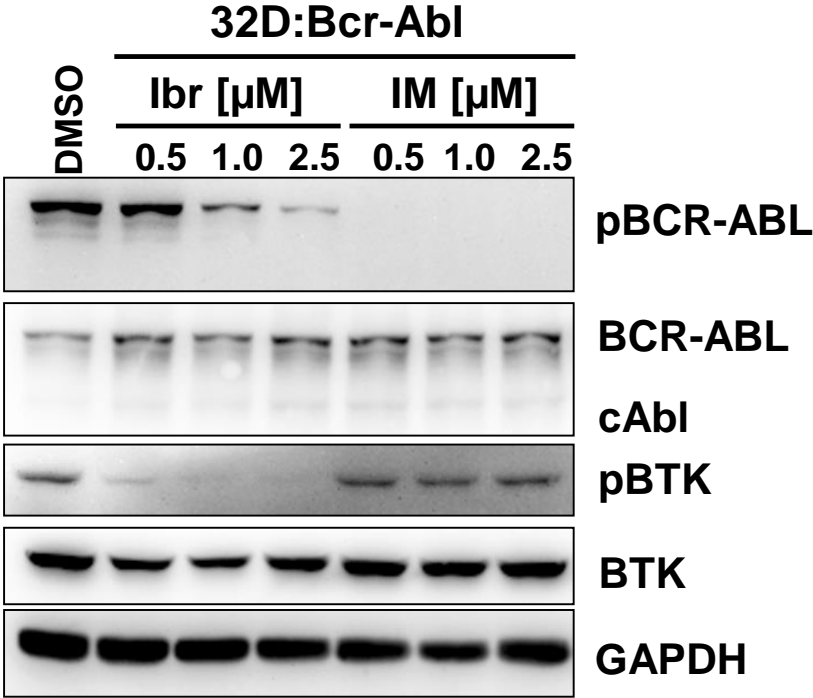

**Effect of Ibrutinib treatment on Bcr-Abl kinase activity in 32D:Bcr-Abl cells.** 32D:Bcr-Abl cells were subjected to ibrutinib (Ibr, 0.5-2.5  $\mu$ M) and imatinib (IM, 0.5-2.5  $\mu$ M) treatment for 4 h. Protein lysates were subsequently analyzed for Bcr-Abl and BTK phosphorylation.

## Supplementary Figure S13

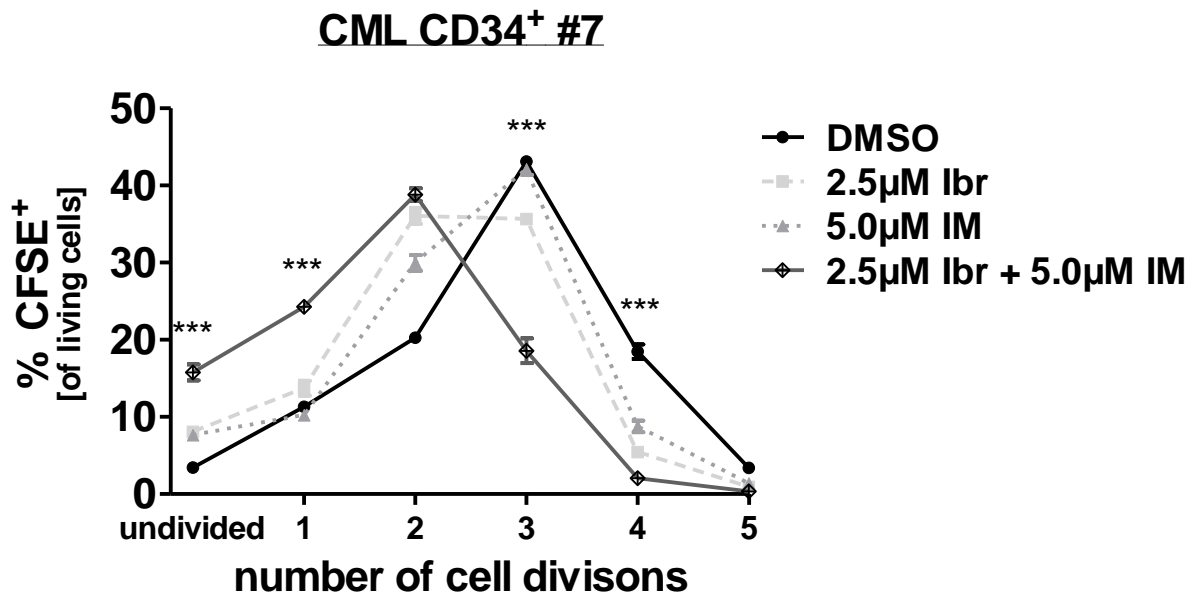

**Combined inhibition of Bcr-Abl and BTK reduces cell division in CML CD34<sup>+</sup> cells (patient CML#4).** Evaluation of cell division upon Ibr and IM treatment using CFSE staining. Data are shown as mean  $\pm$  SD. \*\*\* $p < 0.0001$ ; for a clear presentation, the level of significance is given for Ibr+IM vs. IM only.

## Supplementary Figure S14

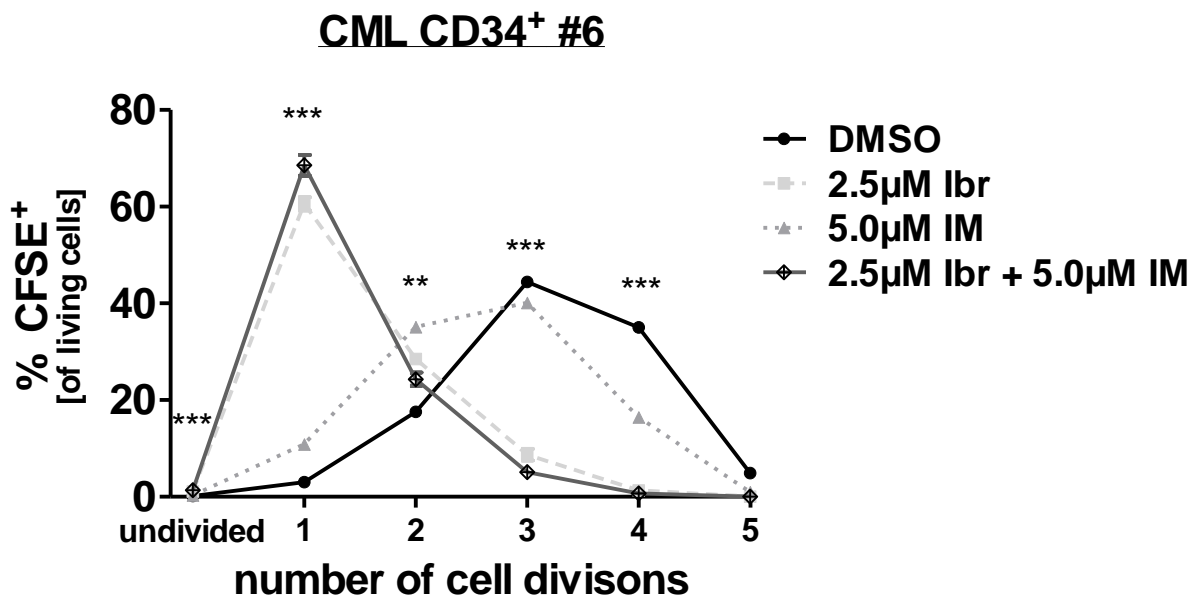

**Combined inhibition of Bcr-Abl and BTK reduces cell division in CML CD34<sup>+</sup> cells (patient CML#4).** Evaluation of cell division upon Ibr and IM treatment using CFSE staining. Data are shown as mean  $\pm$  SD. \*\*\* $p < 0.0001$ ; for a clear presentation, the level of significance is given for Ibr+IM vs. IM only.

Supplementary Figure S15

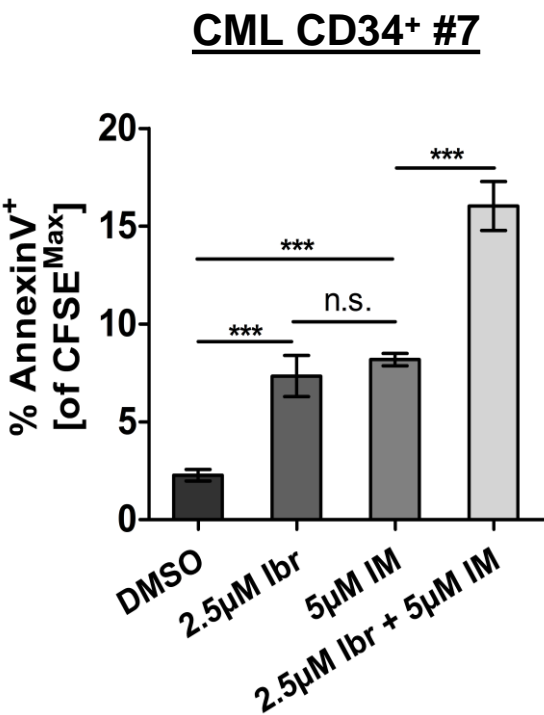

**Combined inhibition of Bcr-Abl and BTK enhances apoptosis in non-dividing LSCs of patient #7.** AnnexinV<sup>+</sup> staining of undivided CFSE<sup>Max</sup> cells of treated CML CD34<sup>+</sup> cells. Data are shown as mean ± SD. \*\*\*p<0.0001; ns= not statistically significant, Ibr= ibrutinib, IM= imatinib.

Supplementary Figure S16

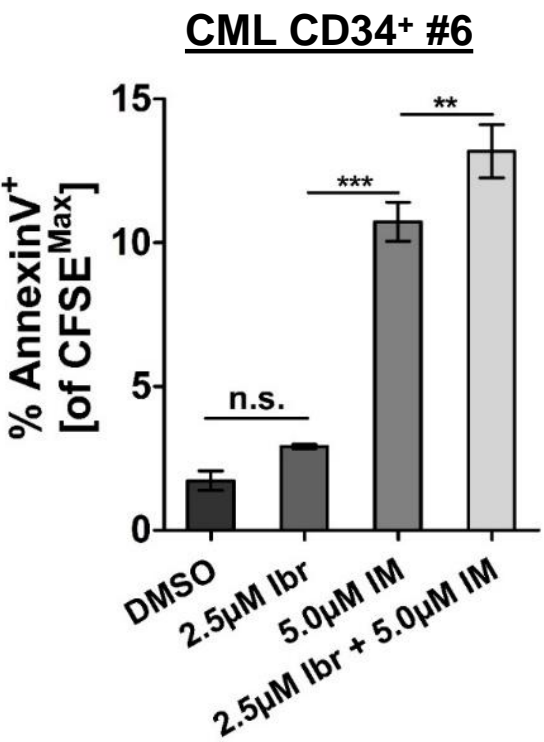

**Combined inhibition of Bcr-Abl and BTK enhances apoptosis in non-dividing LSCs of patient #6.** AnnexinV<sup>+</sup> staining of undivided CFSE<sup>Max</sup> cells of treated CML CD34<sup>+</sup> cells. Data are shown as mean ± SD; \*\*p<0.001, \*\*\*p<0.0001, ns= not statistically significant, Ibr= ibrutinib, IM= imatinib.

Supplementary Figure S17

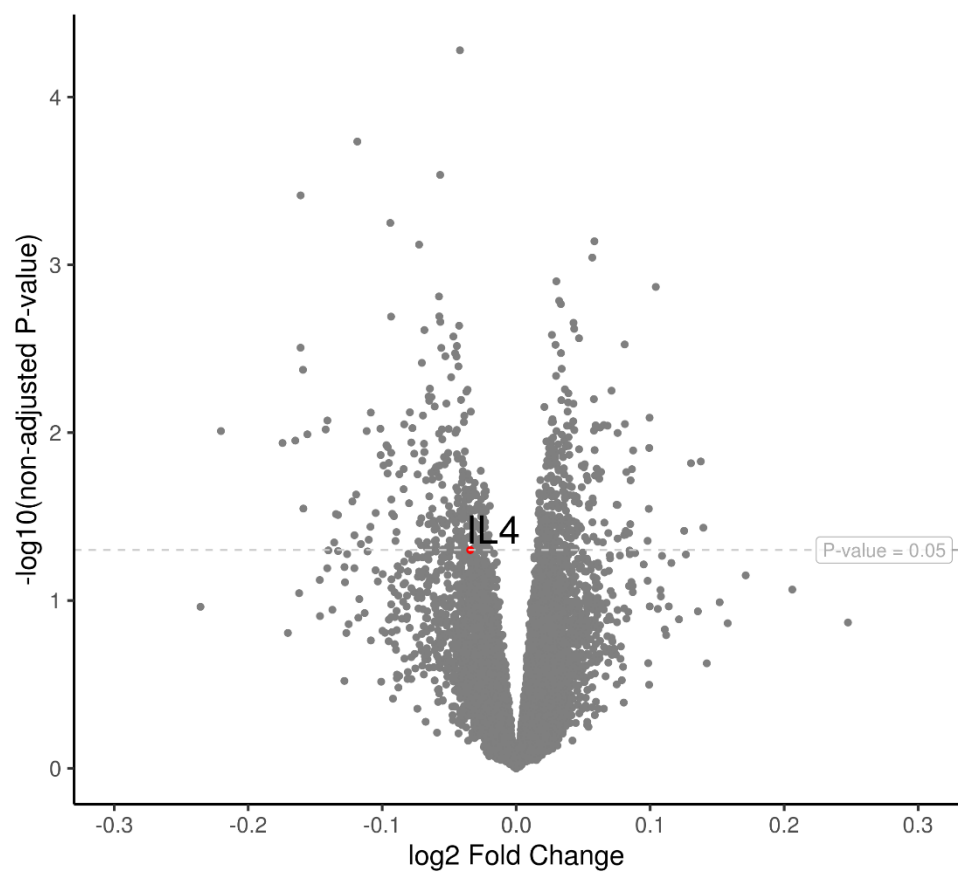

Volcano plot showing gene expression in total BM and pB unfractionated leukocytes in cytogenetic responders compared with non-responders (GSE2535) using non-adjusted p-value.
